# Supplementary material for: Riboflavin based conjugated biomolecule for ultrasensitive detection of nitrophenols
Source: Royal Society of Chemistry journal article supplement (doi:10.1039/d1ra04403f), 2021-01-01
Supplement: d1ra04403f1.pdf [file d1ra04403f1.pdf]

Electronic Supplementary Information

**Riboflavin based conjugated biomolecule for ultrasensitive detection of Nitrophenols**

Bandita Kalita, Priyanka Dutta and Neelotpal Sen Sarma\*

Advanced Materials Laboratory, Physical Sciences Division, Institute of Advanced Study in Science and Technology, Guwahati – 781035, Assam, India

\*Corresponding author: neelot@iasst.gov.in

**XRD analysis:** RC shows a sharp crystalline peak at  $2\theta = 18^\circ$ .

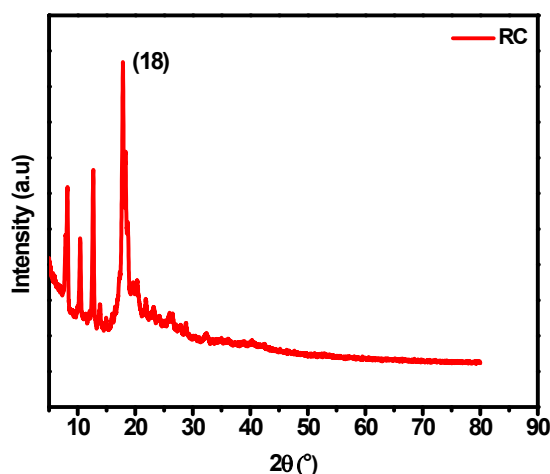

**Figure S1:** XRD spectra of RC

**UV studies:** RC shows strong absorption peak at 445 nm.

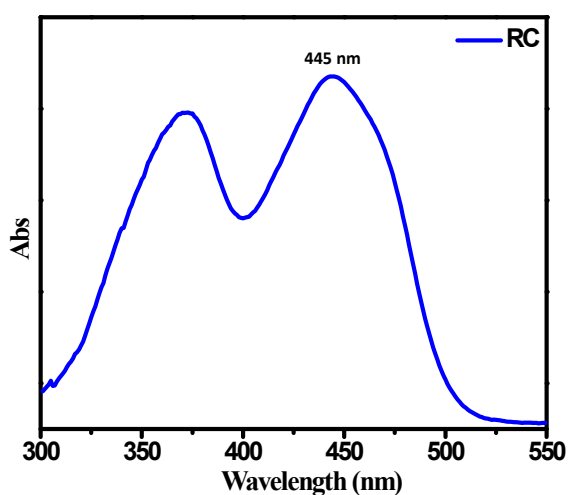

**Figure S2:** UV-vis spectra of RC.

### Interference Study: Interference study on RC+PA

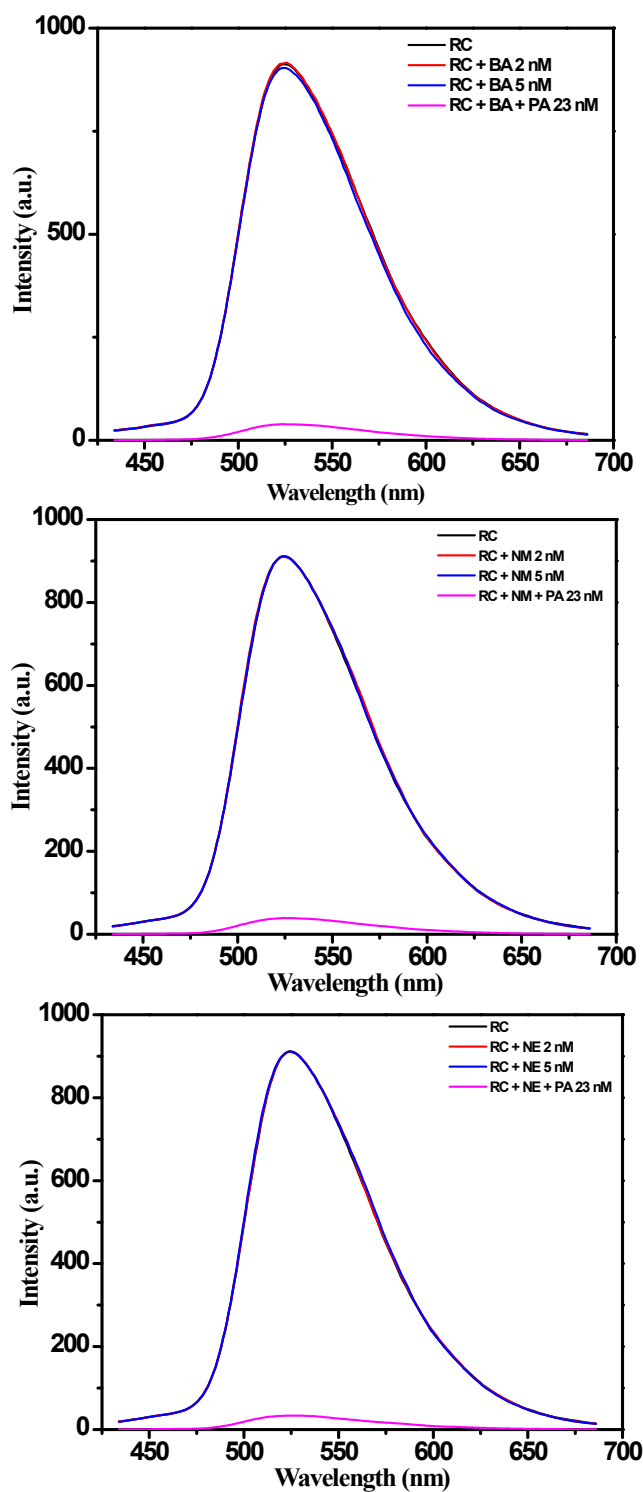

**Figure S3:** Interference of Benzoic acid, Nitromethane and Nitroethane on RC+PA

**UV-Vis Spectra:** UV-vis of RC before and after addition of PA

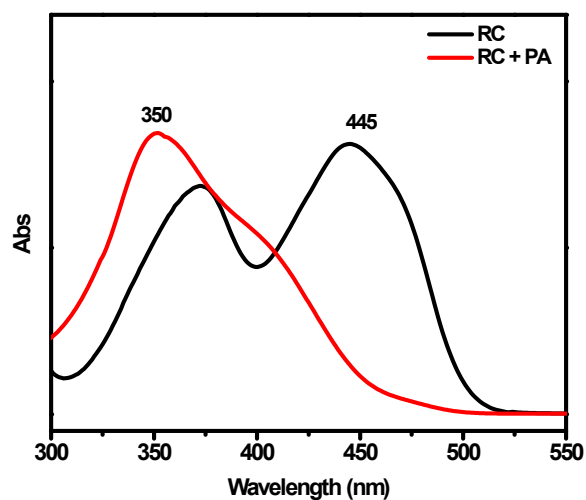

**Figure S4:** UV-vis spectra of RC before and after addition of PA

**DLS Study:** Zeta potential of PA, RC and RC after exposure to PA

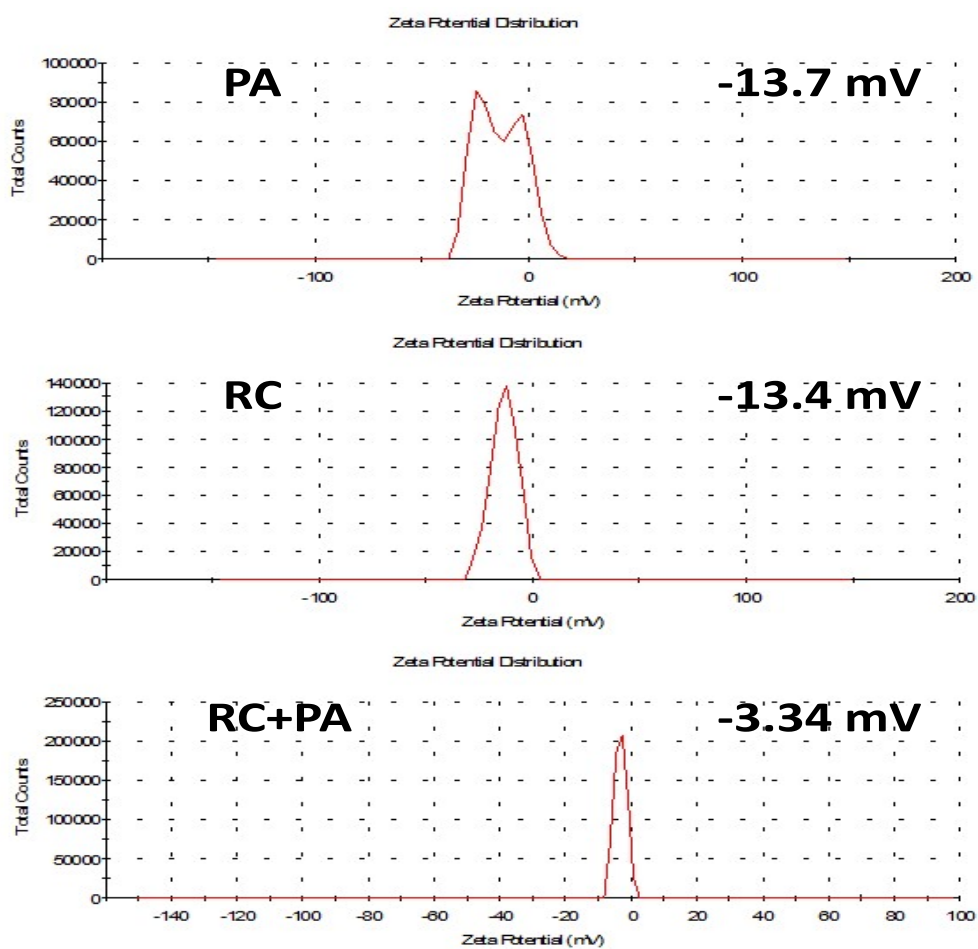

**Figure S5:** Zeta potential of PA, RC and RC+PA
